# Supplementary material for: Coastal earthquake induced landslide susceptibility during the 2016 Mw 7.8 Kaikōura earthquake, New Zealand
Source: Copernicus journal article supplement (doi:10.5194/egusphere-2022-1320), 2023-01-03
Supplement: Supplementary file [file egusphere-2022-1320-AC1-supplement.pdf]

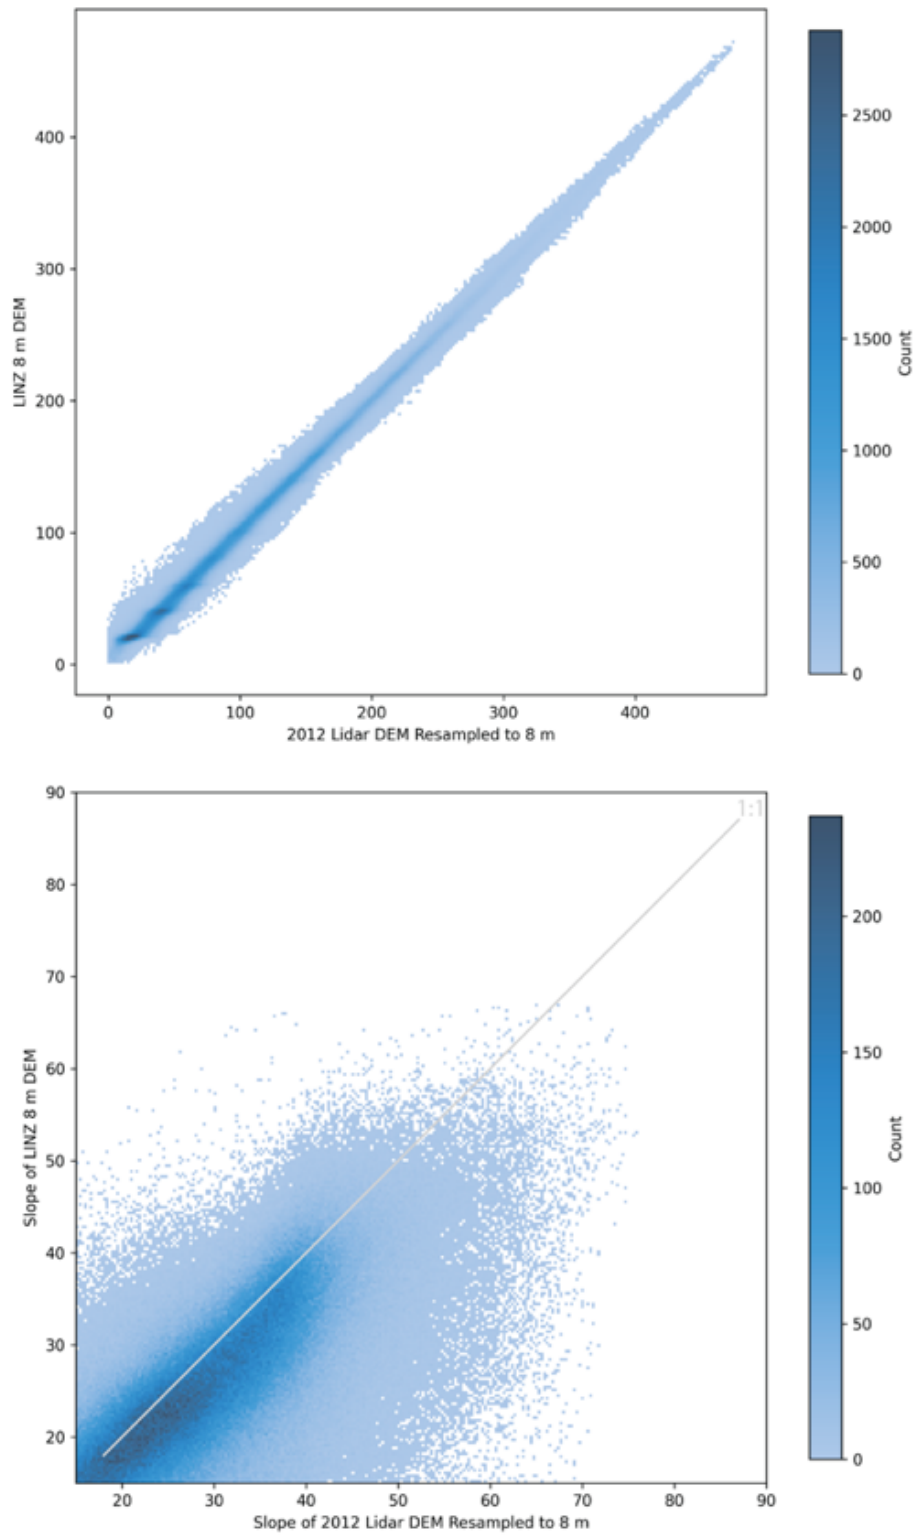

Figure A3. Relationship between LINZ 8 m DEM (LINZ, 2021a) and a 2012 Lidar DEM (LINZ, 2021c) in the top plot. The bottom plot shows the relationship between topographic slope derived from the same two datasets.
